# Supplementary material for: Assessment of Intrathecal Free Light Chain Synthesis: Comparison of Different Quantitative Methods with the Detection of Oligoclonal Free Light Chains by Isoelectric Focusing and Affinity-Mediated Immunoblotting
Source: PubMed Central journal article supplement (PMC5112955; doi:10.1371/journal.pone.0166556), 2016-11-15

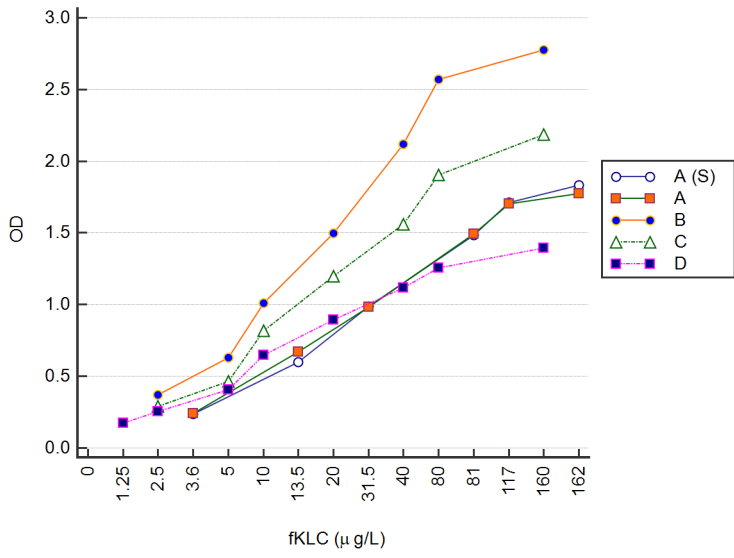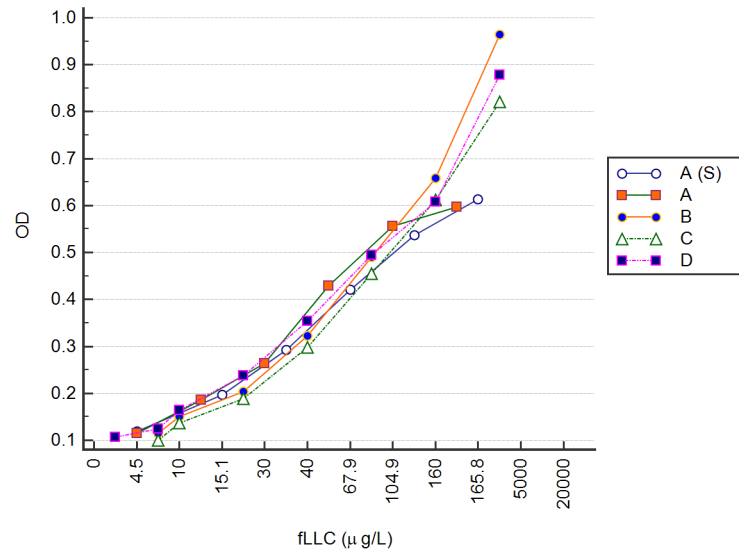

Supplement: pone.0166556.s002.pdf [file pone.0166556.s002.pdf]
